# Supplementary material for: Stepwise construction of discrete parallelogram- and prism-shaped organometallic architectures based on half-sandwich rhodium fragments
Source: Royal Society of Chemistry journal article supplement (doi:10.1039/c7dt02186k), 2017-01-01
Supplement: c7dt02186k1.pdf [file c7dt02186k1.pdf]

Electronic Supplementary Information (ESI)

Stepwise construction of discrete parallelogram- and  
prism-shaped organometallic architectures based on half-  
sandwich rhodium fragments

Wen-Xi Gao, Yue-Jian Lin and Guo-Xin Jin\*

Shanghai Key Laboratory of Molecular Catalysis and Innovative Materials, State Key  
Laboratory of Molecular Engineering of Polymers, Collaborative Innovation Center of  
Chemistry for Energy Materials, Department of Chemistry, Fudan University, Shanghai  
200433, P. R. China.

\*Email: gxjin@fudan.edu.cn.

## 1. NMR spectra

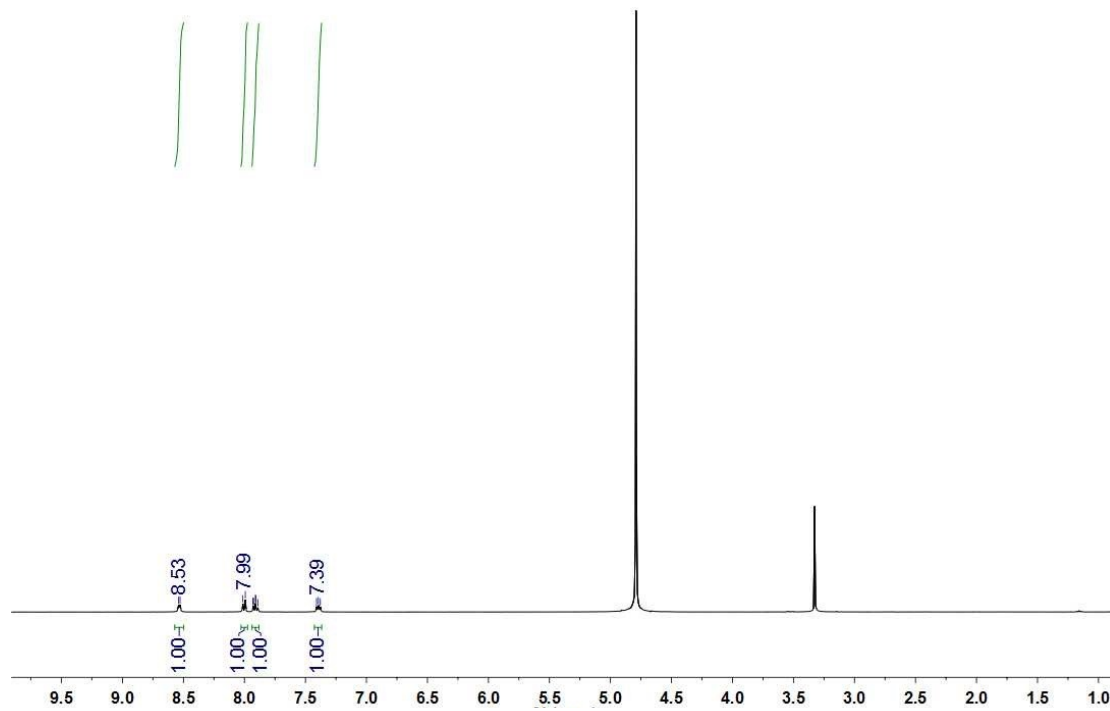

Figure S1. <sup>1</sup>H NMR (400 MHz, D<sub>2</sub>O, ppm) for Li<sub>2</sub>HL.

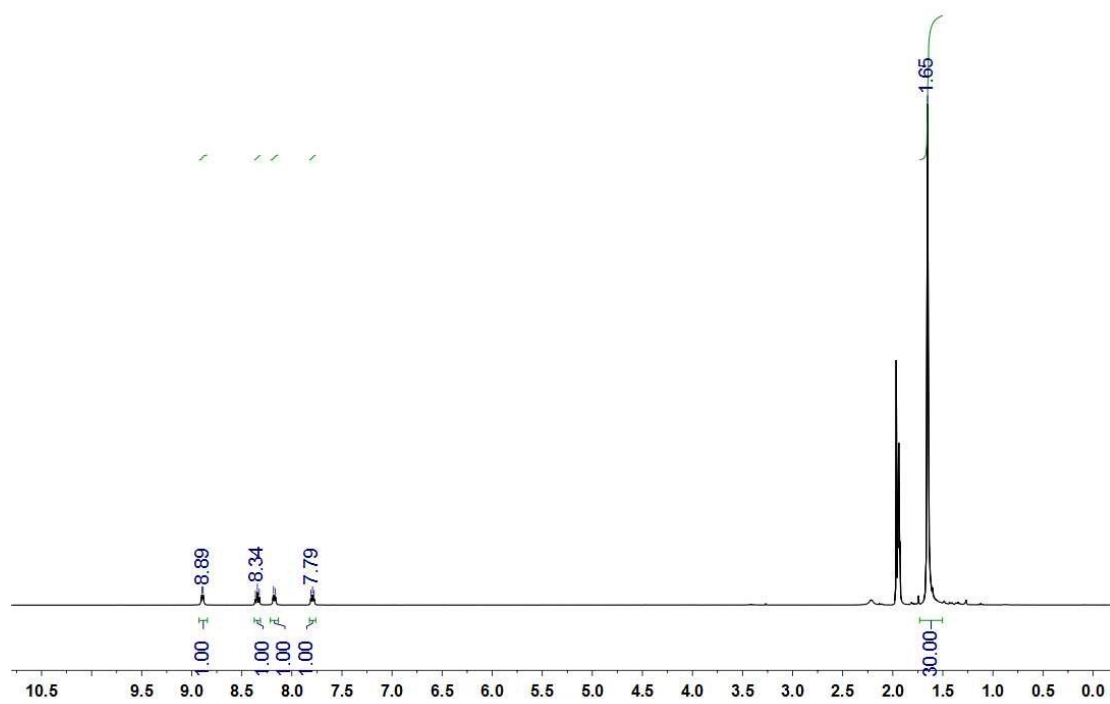

Figure S2. <sup>1</sup>H NMR (400 MHz, CD<sub>3</sub>CN, ppm) for 1.

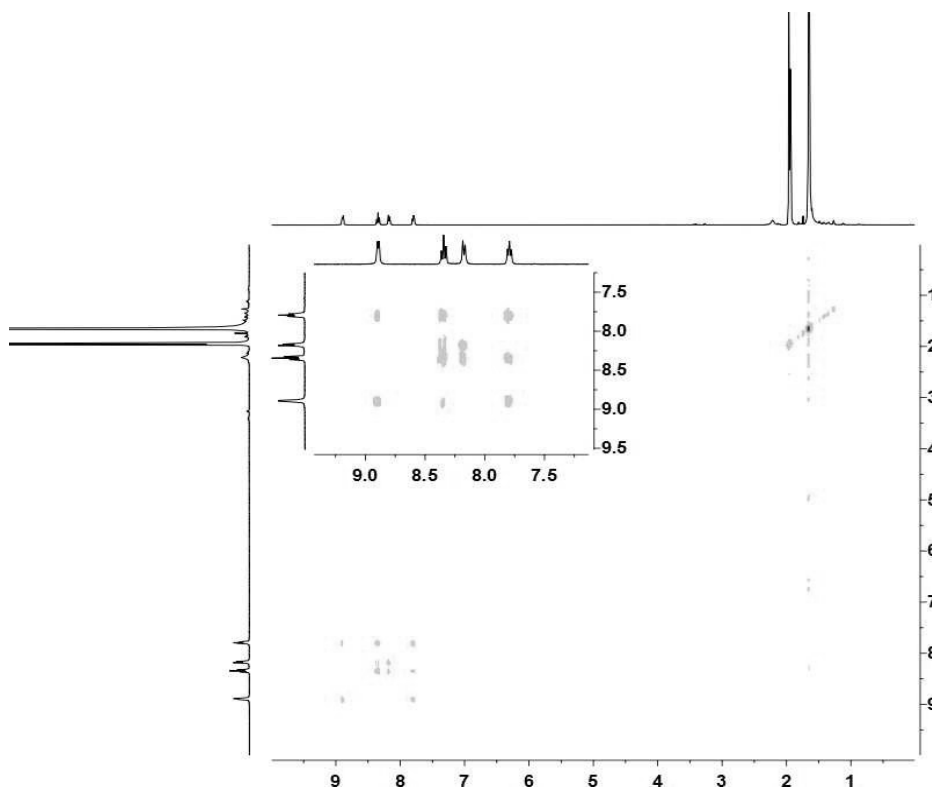

Figure S3.  $^1\text{H}$ - $^1\text{H}$  COSY NMR (400 MHz,  $\text{CD}_3\text{CN}$ , ppm) for **1**.

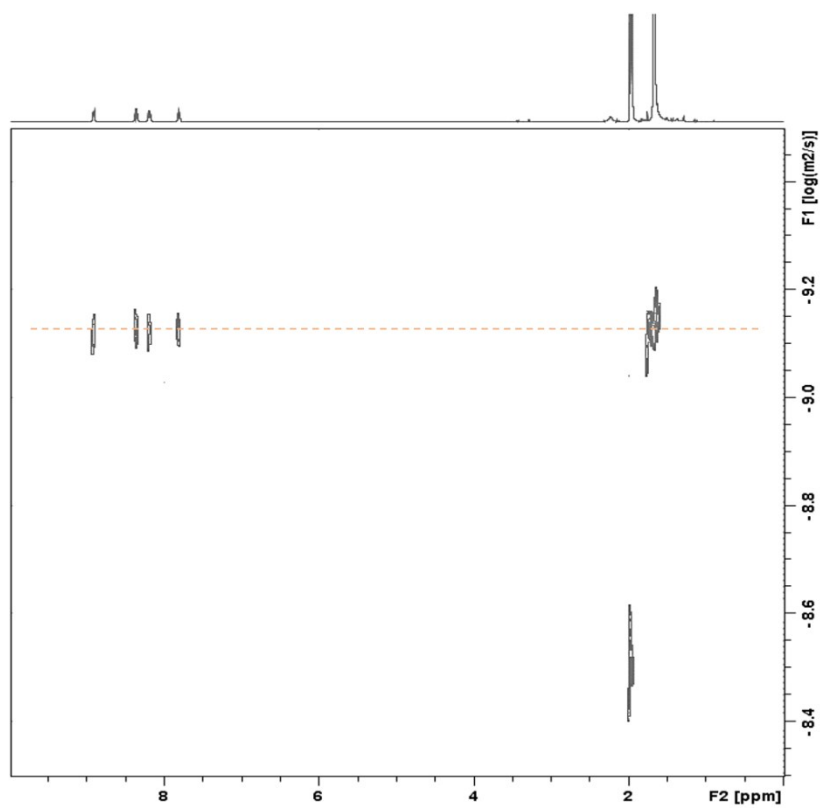

Figure S4.  $^1\text{H}$  DOSY NMR (400 MHz,  $\text{CD}_3\text{CN}$ , ppm) for **1**.

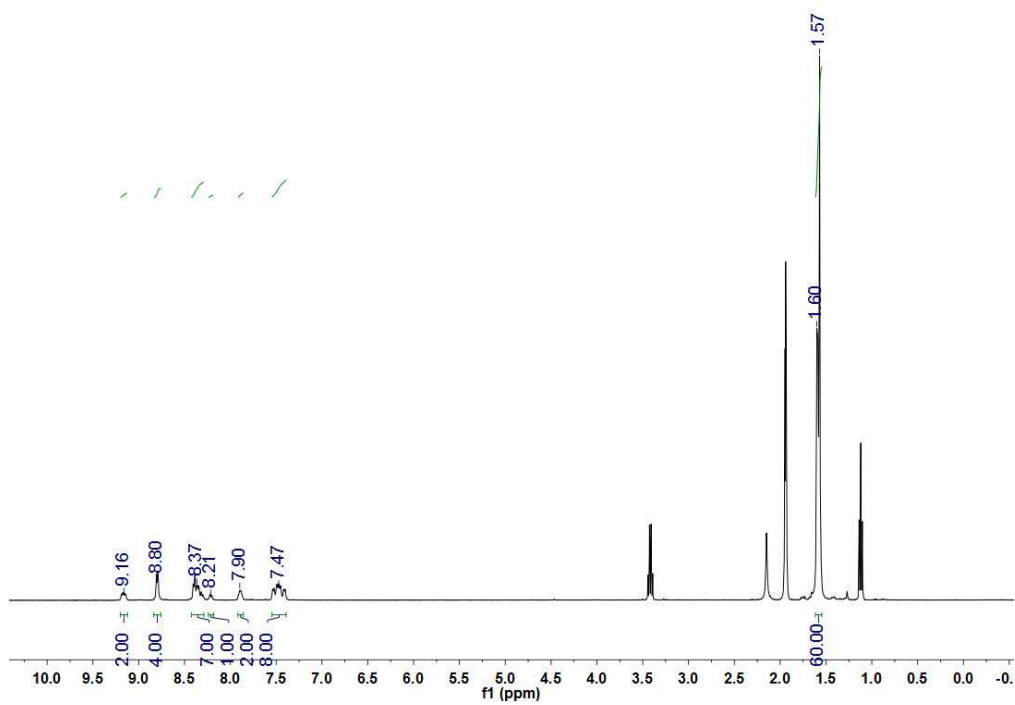

**Figure S5.**  $^1\text{H}$  NMR (400 MHz,  $\text{CD}_3\text{CN}$ , ppm) for **2**.

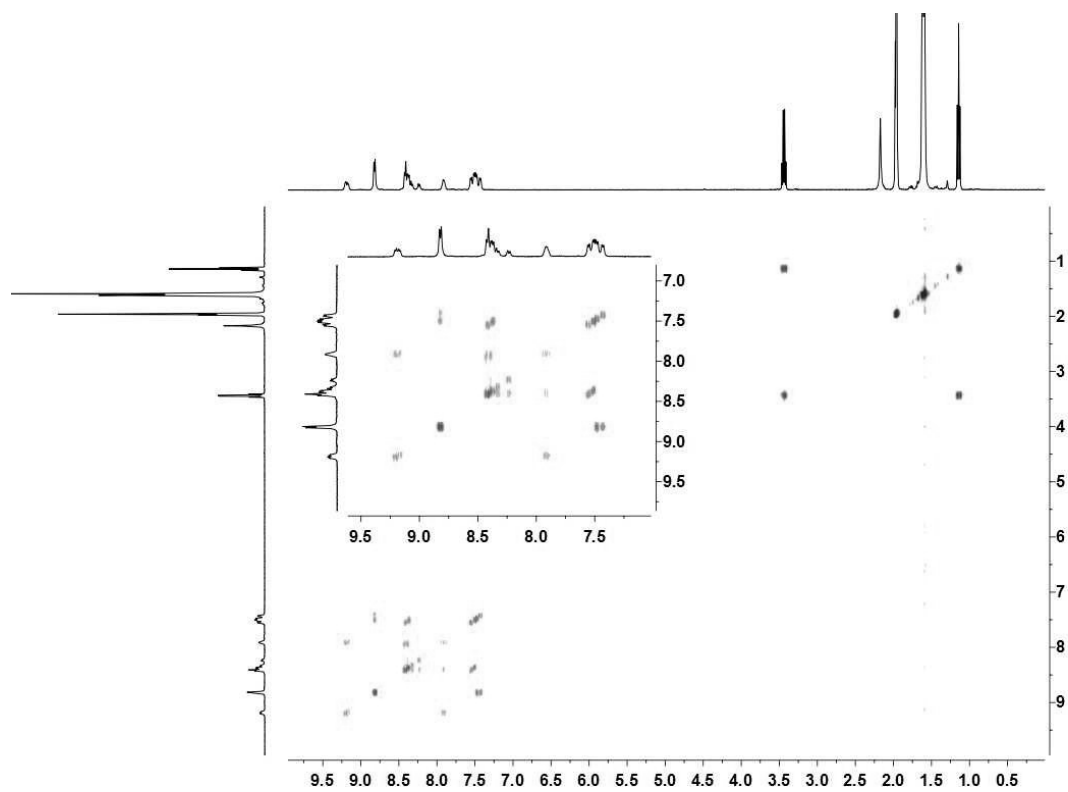

**Figure S6.**  $^1\text{H}$ - $^1\text{H}$  COSY NMR (400 MHz,  $\text{CD}_3\text{CN}$ , ppm) for **2**.

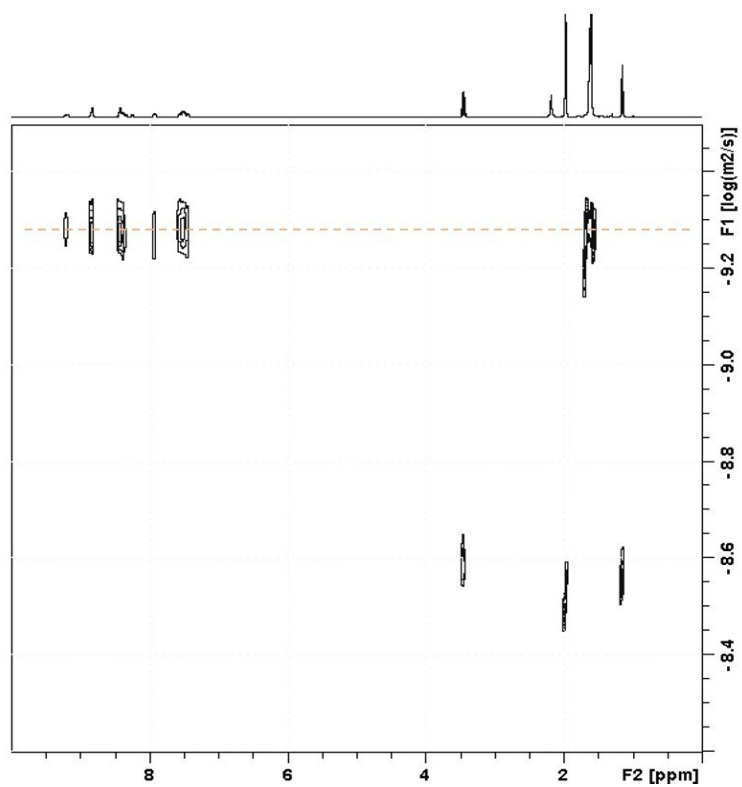

Figure S7.  $^1\text{H}$  DOSY NMR (400 MHz,  $\text{CD}_3\text{CN}$ , ppm) for **2**.

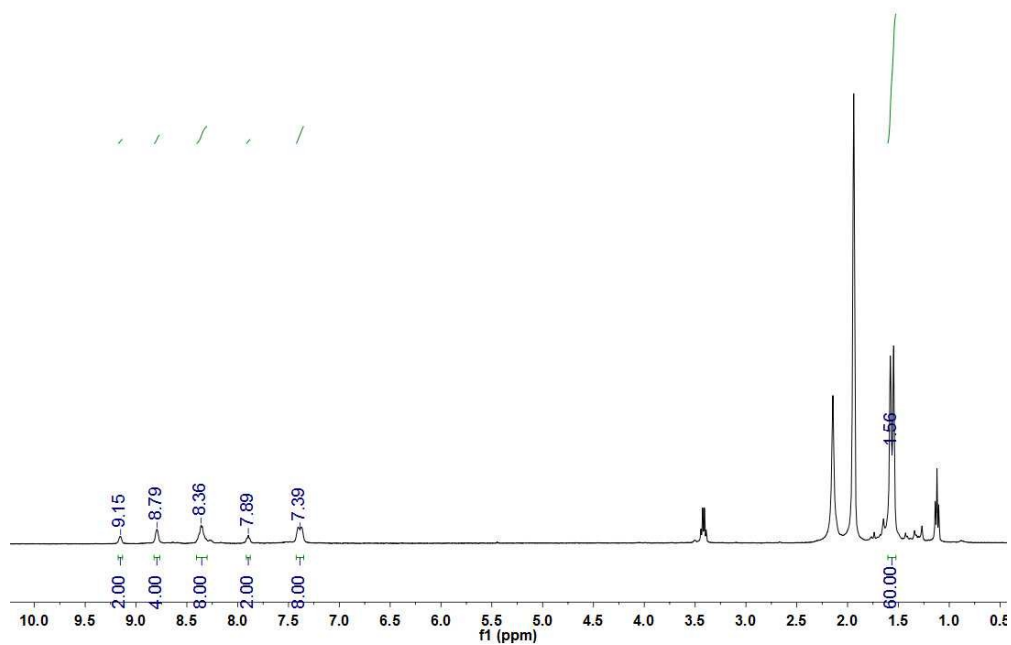

Figure S8.  $^1\text{H}$  NMR (400 MHz,  $\text{CD}_3\text{CN}$ , ppm) for **3**.

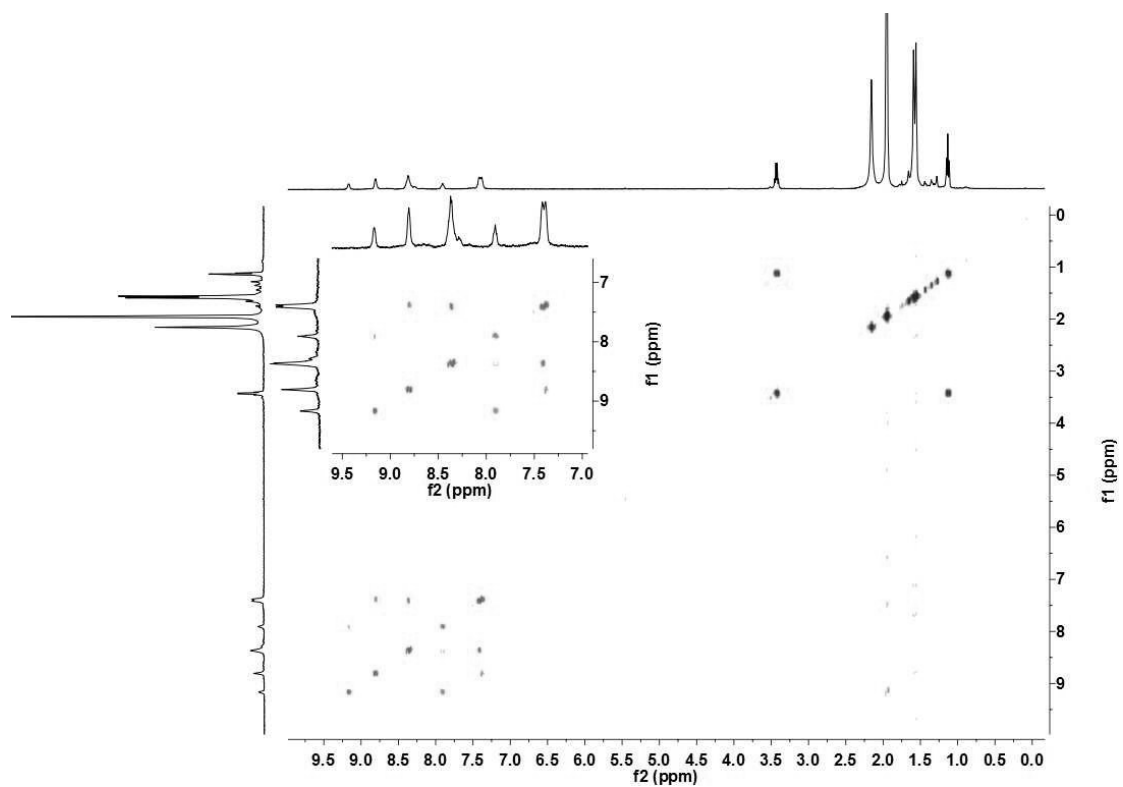

**Figure S9.**  $^1\text{H}$ - $^1\text{H}$  COSY NMR (400 MHz,  $\text{CD}_3\text{CN}$ , ppm) for **3**.

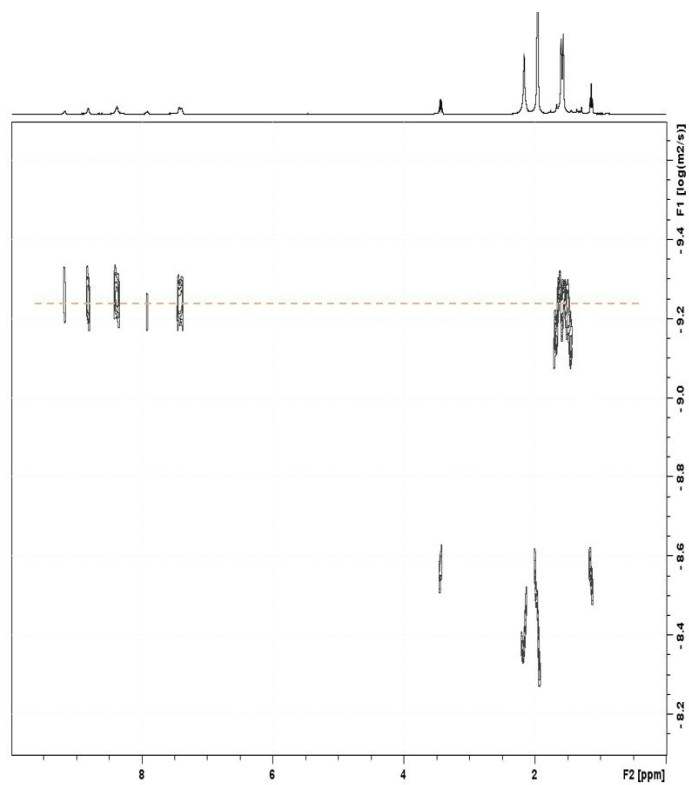

**Figure S10.**  $^1\text{H}$  DOSY NMR (400 MHz,  $\text{CD}_3\text{CN}$ , ppm) for **3**.

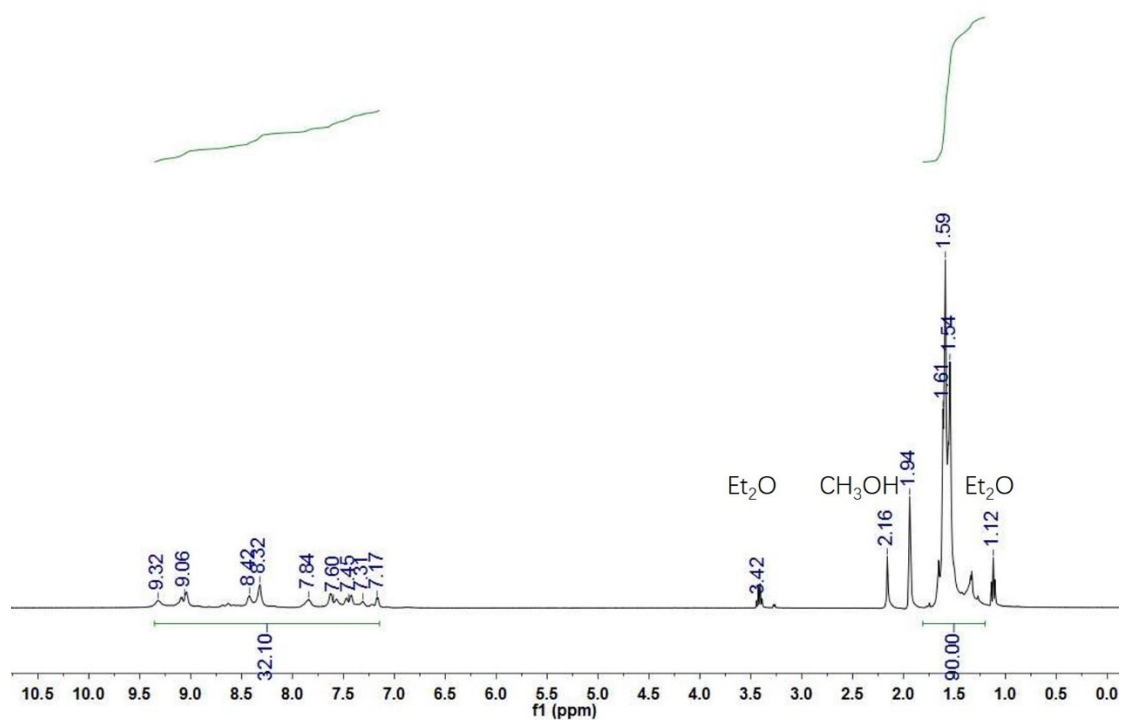

**Figure S11.**  $^1\text{H}$  NMR (400 MHz,  $\text{CD}_3\text{CN}$ , ppm) for **4**.

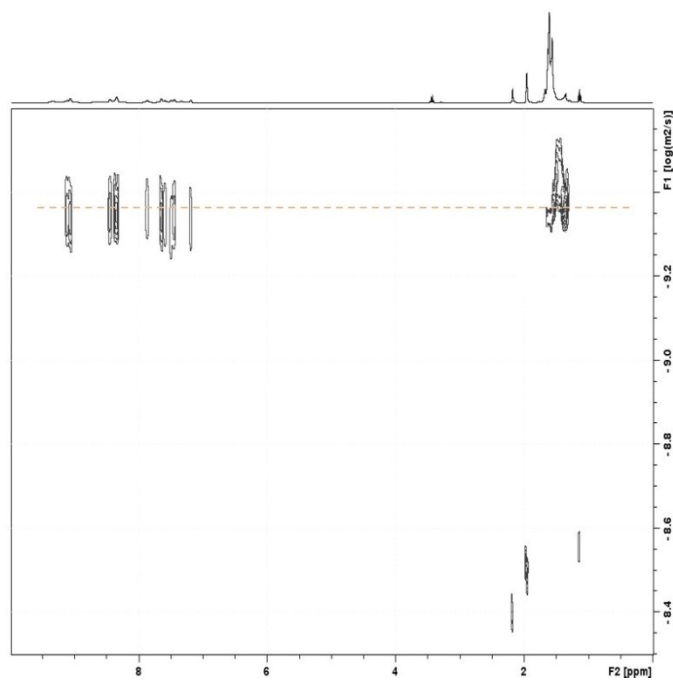

**Figure S12.**  $^1\text{H}$  DOSY NMR (400 MHz,  $\text{CD}_3\text{CN}$ , ppm) for **4**.

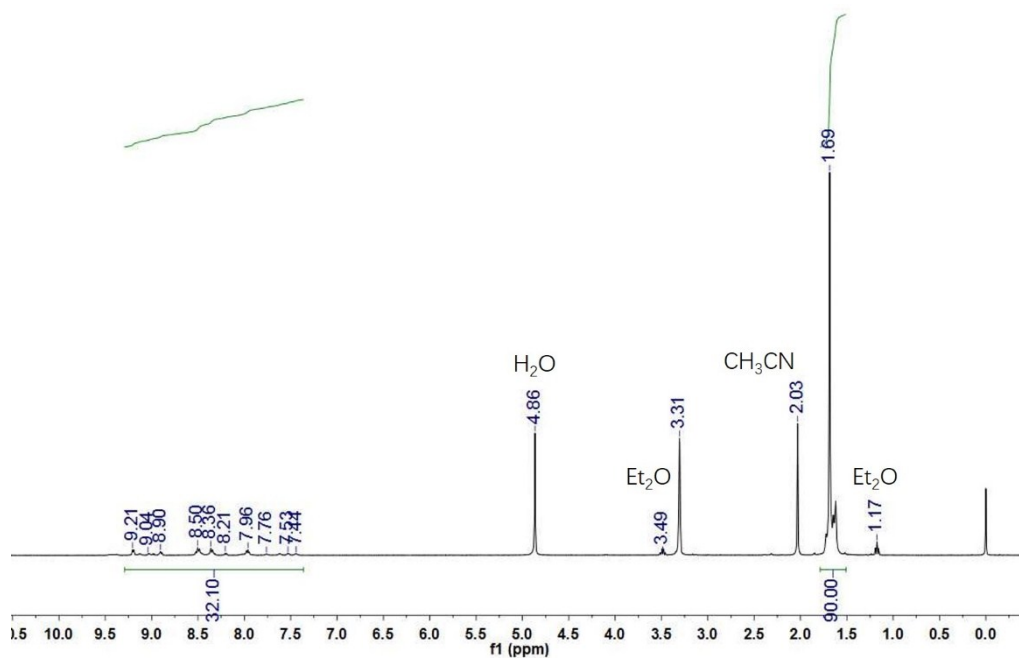

**Figure S13.** <sup>1</sup>H NMR (400 MHz, CD<sub>3</sub>OD, ppm) for **5**.

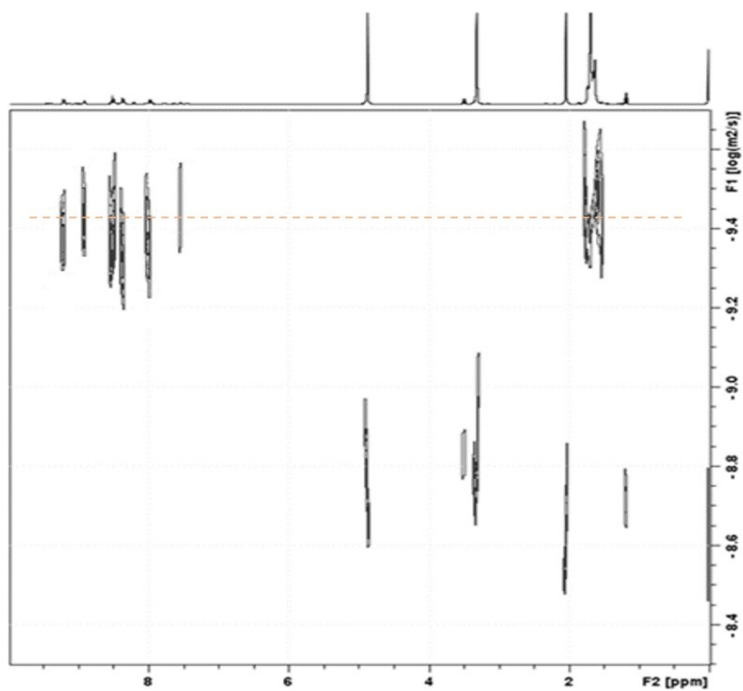

**Figure S14.** <sup>1</sup>H DOSY NMR (400 MHz, CD<sub>3</sub>OD, ppm) for **5**.



## 2. Synthesis of (2-(pyridin-2-yl)-1*H*-imidazole-4,5-dicarboxylate $HL^{2-}$

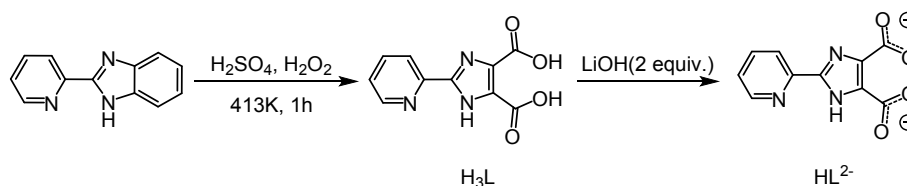

Scheme S1. Synthesis of (2-(pyridin-2-yl)-1*H*-imidazole-4,5-dicarboxylate  $HL^{2-}$

The proligand  $H_3L$  was synthesized according to the literature with some modifications<sup>s1</sup>. 2-(2-Pyridyl)benzimidazole (1 g, 5.13 mmol) was added to 98%  $H_2SO_4$  (8.4 mL) in portions. An  $H_2O_2$  solution (30%, 8 mL) was added dropwise to the above solution at 373 K. The resulting solution was then stirred for 1 h at 413 K. After cooling to 313 K, water (200 mL) was added. The precipitated product was filtered off, washed with water and dried, yielding a light-yellow powder. The corresponding dianion  $HL^{2-}$  was prepared by the reaction of dicarboxylic acid with two equivalents of lithium hydroxide in methanol.  $Li_2HL$ . 478 mg, yield: 38%.  $^1H$  NMR (400 MHz,  $D_2O$ )  $\delta$  = 8.53 (d,  $J$  = 4.5 Hz, 1H, L-H), 8.00 (d,  $J$  = 8.0 Hz, 1H, L-H), 7.84-7.97 (m, 1H, L-H), 7.32-7.46 (m, 1H, L-H). IR (KBr disk,  $cm^{-1}$ )  $\nu$  = 3405, 1598, 1533, 1458, 1421, 1390, 1358, 1263, 1152, 1114, 1001, 803, 744, 710, 557. Anal. Calcd for  $C_{10}H_5Li_2N_3O_4$ : C, 49.01; H, 2.06; N, 17.15. Found: C, 49.01; H, 2.16; N, 17.21.

### 3. Molecular structures of complex 3 and 5

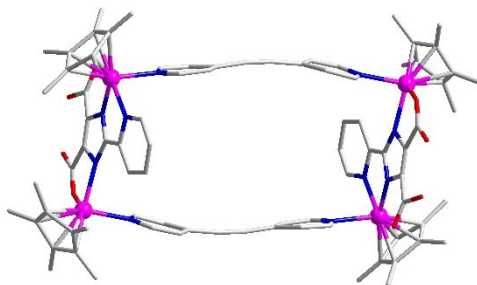

**Figure S15.** X-ray crystal structure of cationic part of tetranuclear macrocycle **3**. Hydrogen atoms, OTf<sup>-</sup> anions, solvent molecules and disorder are omitted for clarity (N, blue; O, red; C, gray; Rh, pink).

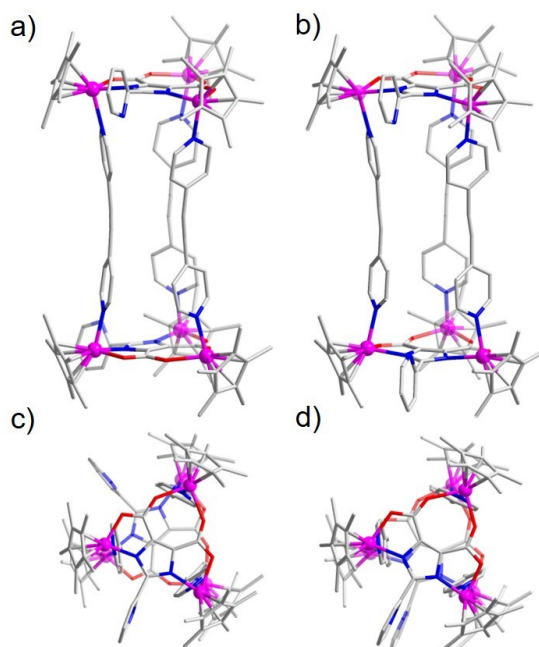

**Figure S16.** X-ray crystal structure of cationic parts of hexanuclear triangular prismatic complex **5a/5b**: a) side view of **5a**; b) side view of **5b**; c) top view of **5a**; d) top view of **5b**. Hydrogen atoms, OTf<sup>-</sup> anions, solvent molecules and disorder are omitted for clarity (N, blue; O, red; C, gray; Rh, pink)

#### 4. One-dimensional chain structure composed of binuclear complex 1

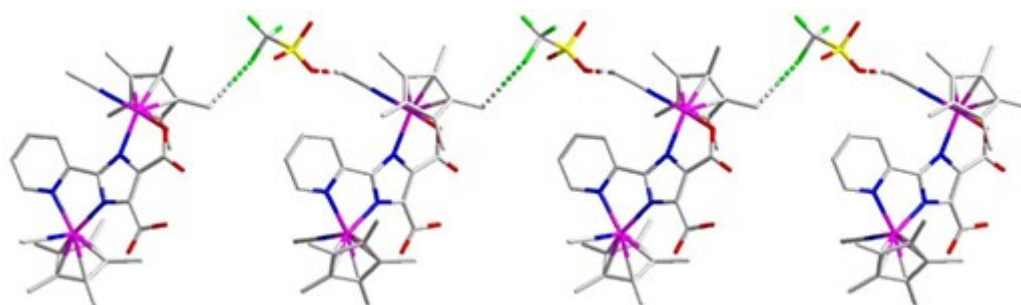

**Figure S17.** One-dimensional chain structure composed of dinuclear complex **1** viewed along the *b* axis. Part of hydrogen atoms and OTf<sup>-</sup> anions, solvent molecules and disorder are omitted for clarity except those involved in hydrogen bonding (N, blue; O, red; C, gray; S, yellow; F, bright green; Rh, pink).

## 5. X-ray Crystallography Details.

Single crystals of **1**, **2**, **3**, **4** and **5** suitable for X-ray diffraction study were obtained at room temperature. X-ray intensity data of **1** and **2/3/4** were collected on a CCD-Bruker SMART APEX system at 223 K and 173K respectively, data of **5** was collected on a Bruker D8 VENTURE system at 173 K. In these data, the disordered solvent molecules which could not be restrained properly were removed using the SQUEEZE route.

In asymmetric unit of **1**, there was one disordered triflate anion which could not be restrained properly. Therefore, SQUEEZE algorithm was used to omit it. One pentamethylcyclopentadienyl ligand (Cp\* for short) was disordered and it was divided into two parts (61:39). 19 ISOR and 6 DFIX instructions were used to restrain Cp\* fragments so that there were 120 restraints in the data.

In asymmetric unit of **2**, there were disordered solvents (four methanol and one water molecules) which could not be restrained properly. Therefore, SQUEEZE algorithm was used to omit them. One of four triflate anions was disordered and it was divided into two parts (57:43). 22 ISOR and 35 DFIX instructions were used to restrain anions, solvents and Cp\* fragments so that there were 167 restraints in the data. Hydrogen of methanol molecules could not be found and others were put in calculated positions.

In asymmetric unit of **3**, there were disordered solvents (one di-isopropyl ether, two methanol and two water molecules) which could not be restrained properly. Therefore, SQUEEZE algorithm was used to omit them. One triflate anion was disordered and it was divided into two parts (51:49). 50 ISOR, 1 SIMU and 8 DFIX instructions were used to restrain anions and Cp\* fragments so that there were 344 restraints in the data.

In asymmetric unit of **4**, there were disordered anions and solvents (three triflate anions, two methanol and one water molecules) which could not be restrained properly. Therefore, SQUEEZE algorithm was used to omit them. The imidazoledicarboxylate ligand was disordered and it was divided into two parts (54:46). 40 ISOR, 4 SIMU and 29 DFIX instructions were used to restrain ligand and Cp\* fragments so that there were 359 restraints in the data. Hydrogen of water molecules could not be found and others were put in calculated positions.

In asymmetric unit of **5**, there were disordered anions and solvents (two and a half triflate anions, one methanol and four water molecules) which could not be restrained properly. Therefore, SQUEEZE algorithm was used to omit them. The imidazoledicarboxylate ligand was disordered and it was divided into two parts (53:47). 47 ISOR, 4 SIMU and 31 DFIX instructions were used to restrain anions, ligands and Cp\* fragments so that there were 511 restraints in the data.

**Table S1.** Crystal data and structure refinement for **1**.

|                                                     |                                          |                              |
|-----------------------------------------------------|------------------------------------------|------------------------------|
| Empirical formula                                   | $C_{36}H_{41}F_6N_5O_{10}Rh_2S_2$        |                              |
| Formula weight                                      | 1087.68                                  |                              |
| Temperature                                         | 223(2) K                                 |                              |
| Wavelength                                          | 0.71073 Å                                |                              |
| Crystal system                                      | Monoclinic                               |                              |
| Space group                                         | $P2_1/c$                                 |                              |
| Unit cell dimensions                                | $a = 15.658(4)$ Å                        | $\alpha = 90^\circ$ .        |
|                                                     | $b = 11.827(3)$ Å                        | $\beta = 105.898(4)^\circ$ . |
|                                                     | $c = 24.371(5)$ Å                        | $\gamma = 90^\circ$ .        |
| Volume                                              | 4340.7(17) Å <sup>3</sup>                |                              |
| Z                                                   | 4                                        |                              |
| Density (calculated)                                | 1.664 Mg/m <sup>3</sup>                  |                              |
| Absorption coefficient                              | 0.941 mm <sup>-1</sup>                   |                              |
| F(000)                                              | 2192                                     |                              |
| Crystal size                                        | 0.250 x 0.220 x 0.180 mm <sup>3</sup>    |                              |
| Theta range for data collection                     | 1.352 to 26.723°.                        |                              |
| Index ranges                                        | -19 ≤ h ≤ 19, -14 ≤ k ≤ 14, -21 ≤ l ≤ 30 |                              |
| Reflections collected                               | 29099                                    |                              |
| Independent reflections                             | 9110 [ $R(\text{int}) = 0.0984$ ]        |                              |
| Completeness to $\theta = 25.242^\circ$             | 99.6 %                                   |                              |
| Absorption correction                               | Semi-empirical from equivalents          |                              |
| Max. and min. transmission                          | 0.724 and 0.613                          |                              |
| Refinement method                                   | Full-matrix least-squares on $F^2$       |                              |
| Data / restraints / parameters                      | 9110 / 120 / 544                         |                              |
| Goodness-of-fit on $F^2$                            | 0.946                                    |                              |
| Final R indices [ $I > 2\sigma(I)$ ] <sup>[a]</sup> | $R_1 = 0.0721$ , $wR_2 = 0.1787$         |                              |
| R indices (all data)                                | $R_1 = 0.1397$ , $wR_2 = 0.2048$         |                              |
| Extinction coefficient                              | n/a                                      |                              |
| Largest diff. peak and hole                         | 0.810 and -0.750 e.Å <sup>-3</sup>       |                              |

[a]  $R_1 = \sum ||F_o| - |F_c||$  (based on reflections with  $F_o^2 > 2\sigma F^2$ ).  $wR_2 = [\sum [w(F_o^2 - F_c^2)^2] / \sum [w(F_o^2)^2]]^{1/2}$ ;  $w = 1 / [\sigma^2(F_o^2) + (0.095P)^2]$ ;  $P = [\max(F_o^2, 0) + 2F_c^2] / 3$  (also with  $F_o^2 > 2\sigma F^2$ )

**Table S2.** Crystal data and structure refinement for **2**.

|                                                     |                                          |                               |
|-----------------------------------------------------|------------------------------------------|-------------------------------|
| Empirical formula                                   | $C_{90}H_{112}F_{12}N_{10}O_{27}Rh_4S_4$ |                               |
| Formula weight                                      | 2533.77                                  |                               |
| Temperature                                         | 173(2) K                                 |                               |
| Wavelength                                          | 0.71073 Å                                |                               |
| Crystal system                                      | Triclinic                                |                               |
| Space group                                         | P-1                                      |                               |
| Unit cell dimensions                                | $a = 15.3538(17)$ Å                      | $\alpha = 109.857(2)^\circ$ . |
|                                                     | $b = 17.894(2)$ Å                        | $\beta = 91.607(2)^\circ$ .   |
|                                                     | $c = 20.376(2)$ Å                        | $\gamma = 96.139(2)^\circ$ .  |
| Volume                                              | $5222.8(10)$ Å <sup>3</sup>              |                               |
| Z                                                   | 2                                        |                               |
| Density (calculated)                                | 1.611 Mg/m <sup>3</sup>                  |                               |
| Absorption coefficient                              | 0.800 mm <sup>-1</sup>                   |                               |
| F(000)                                              | 2580                                     |                               |
| Crystal size                                        | 0.110 x 0.100 x 0.090 mm <sup>3</sup>    |                               |
| Theta range for data collection                     | 1.219 to 25.010°.                        |                               |
| Index ranges                                        | -17 ≤ h ≤ 18, -20 ≤ k ≤ 21, -20 ≤ l ≤ 24 |                               |
| Reflections collected                               | 32624                                    |                               |
| Independent reflections                             | 18395 [ $R(\text{int}) = 0.1673$ ]       |                               |
| Completeness to theta = 25.010°                     | 99.7 %                                   |                               |
| Absorption correction                               | Semi-empirical from equivalents          |                               |
| Max. and min. transmission                          | 0.745 and 0.679                          |                               |
| Refinement method                                   | Full-matrix least-squares on $F^2$       |                               |
| Data / restraints / parameters                      | 18395 / 167 / 1318                       |                               |
| Goodness-of-fit on $F^2$                            | 0.837                                    |                               |
| Final R indices [ $I > 2\sigma(I)$ ] <sup>[a]</sup> | $R_1 = 0.0642$ , $wR_2 = 0.1405$         |                               |
| R indices (all data)                                | $R_1 = 0.1416$ , $wR_2 = 0.1714$         |                               |
| Extinction coefficient                              | n/a                                      |                               |
| Largest diff. peak and hole                         | 1.342 and -1.453 e.Å <sup>-3</sup>       |                               |

[a]  $R_1 = \sum ||F_o| - |F_c||$  (based on reflections with  $F_o^2 > 2\sigma F^2$ ).  $wR_2 = [\sum [w(F_o^2 - F_c^2)^2] / \sum [w(F_o^2)^2]]^{1/2}$ ;  $w = 1 / [\sigma^2(F_o^2) + (0.095P)^2]$ ;  $P = [\max(F_o^2, 0) + 2F_c^2] / 3$  (also with  $F_o^2 > 2\sigma F^2$ )

**Table S3.** Crystal data and structure refinement for **3**.

|                                      |                                           |                              |
|--------------------------------------|-------------------------------------------|------------------------------|
| Empirical formula                    | $C_{104}H_{138}F_{12}N_{10}O_{30}Rh_4S_4$ |                              |
| Formula weight                       | 2776.12                                   |                              |
| Temperature                          | 173(2) K                                  |                              |
| Wavelength                           | 0.71073 Å                                 |                              |
| Crystal system                       | Triclinic                                 |                              |
| Space group                          | P-1                                       |                              |
| Unit cell dimensions                 | $a = 11.772(3)$ Å                         | $\alpha = 73.978(4)^\circ$ . |
|                                      | $b = 13.853(3)$ Å                         | $\beta = 78.962(4)^\circ$ .  |
|                                      | $c = 18.827(4)$ Å                         | $\gamma = 77.523(4)^\circ$ . |
| Volume                               | 2852.8(11) Å <sup>3</sup>                 |                              |
| Z                                    | 1                                         |                              |
| Density (calculated)                 | 1.616 Mg/m <sup>3</sup>                   |                              |
| Absorption coefficient               | 0.742 mm <sup>-1</sup>                    |                              |
| F(000)                               | 1424                                      |                              |
| Crystal size                         | 0.520 x 0.410 x 0.280 mm <sup>3</sup>     |                              |
| Theta range for data collection      | 1.137 to 25.008°.                         |                              |
| Index ranges                         | -13<=h<=13, -16<=k<=11, -22<=l<=11        |                              |
| Reflections collected                | 7980                                      |                              |
| Independent reflections              | 7710 [ $R(\text{int}) = 0.0399$ ]         |                              |
| Completeness to theta = 25.008°      | 76.7 %                                    |                              |
| Absorption correction                | Semi-empirical from equivalents           |                              |
| Max. and min. transmission           | 0.647 and 0.540                           |                              |
| Refinement method                    | Full-matrix least-squares on $F^2$        |                              |
| Data / restraints / parameters       | 7710 / 344 / 668                          |                              |
| Goodness-of-fit on $F^2$             | 1.653                                     |                              |
| Final R indices [ $I > 2\sigma(I)$ ] | $R_I = 0.1168$ , $wR_2 = 0.3167$          |                              |
| R indices (all data)                 | $R_I = 0.1546$ , $wR_2 = 0.3967$          |                              |
| Extinction coefficient               | n/a                                       |                              |
| Largest diff. peak and hole          | 3.532 and -3.098 e.Å <sup>-3</sup>        |                              |

[a]  $R_I = \sum ||F_o| - |F_c||$  (based on reflections with  $F_o^2 > 2\sigma F^2$ ).  $wR_2 = [\sum [w(F_o^2 - F_c^2)^2] / \sum [w(F_o^2)^2]]^{1/2}$ ;  $w = 1 / [\sigma^2(F_o^2) + (0.095P)^2]$ ;  $P = [\max(F_o^2, 0) + 2F_c^2] / 3$  (also with  $F_o^2 > 2\sigma F^2$ )

**Table S4.** Crystal data and structure refinement for **4**.

|                                                     |                                           |                              |
|-----------------------------------------------------|-------------------------------------------|------------------------------|
| Empirical formula                                   | $C_{120}H_{146}F_{18}N_{12}O_{33}Rh_6S_6$ |                              |
| Formula weight                                      | 3436.30                                   |                              |
| Temperature                                         | 173(2) K                                  |                              |
| Wavelength                                          | 0.71073 Å                                 |                              |
| Crystal system                                      | Monoclinic                                |                              |
| Space group                                         | C2/c                                      |                              |
| Unit cell dimensions                                | $a = 21.867(5)$ Å                         | $\alpha = 90^\circ$ .        |
|                                                     | $b = 26.493(6)$ Å                         | $\beta = 106.754(4)^\circ$ . |
|                                                     | $c = 27.213(6)$ Å                         | $\gamma = 90^\circ$ .        |
| Volume                                              | 15096(6) Å <sup>3</sup>                   |                              |
| Z                                                   | 4                                         |                              |
| Density (calculated)                                | 1.512 Mg/m <sup>3</sup>                   |                              |
| Absorption coefficient                              | 0.817 mm <sup>-1</sup>                    |                              |
| F(000)                                              | 6968                                      |                              |
| Crystal size                                        | 0.420 x 0.210 x 0.180 mm <sup>3</sup>     |                              |
| Theta range for data collection                     | 1.240 to 26.000°.                         |                              |
| Index ranges                                        | -25 ≤ h ≤ 26, -32 ≤ k ≤ 32, -27 ≤ l ≤ 33  |                              |
| Reflections collected                               | 49051                                     |                              |
| Independent reflections                             | 14808 [R(int) = 0.0929]                   |                              |
| Completeness to theta = 25.242°                     | 99.7 %                                    |                              |
| Absorption correction                               | Semi-empirical from equivalents           |                              |
| Max. and min. transmission                          | 0.746 and 0.617                           |                              |
| Refinement method                                   | Full-matrix least-squares on $F^2$        |                              |
| Data / restraints / parameters                      | 14808 / 359 / 787                         |                              |
| Goodness-of-fit on F2                               | 1.002                                     |                              |
| Final R indices [ $I > 2\sigma(I)$ ] <sup>[a]</sup> | $R_1 = 0.0747$ , $wR_2 = 0.2135$          |                              |
| R indices (all data)                                | $R_1 = 0.1322$ , $wR_2 = 0.2334$          |                              |
| Extinction coefficient                              | n/a                                       |                              |
| Largest diff. peak and hole                         | 0.981 and -0.578 e.Å <sup>-3</sup>        |                              |

[a]  $R_1 = \sum ||F_o| - |F_c||$  (based on reflections with  $F_o^2 > 2\sigma F^2$ ).  $wR_2 = [\sum [w(F_o^2 - F_c^2)^2] / \sum [w(F_o^2)^2]]^{1/2}$ ;  $w = 1 / [\sigma^2(F_o^2) + (0.095P)^2]$ ;  $P = [\max(F_o^2, 0) + 2F_c^2] / 3$  (also with  $F_o^2 > 2\sigma F^2$ )



**Table S5.** Crystal data and structure refinement for **5**.

|                                                     |                                           |                              |
|-----------------------------------------------------|-------------------------------------------|------------------------------|
| Empirical formula                                   | $C_{124}H_{146}F_{18}N_{12}O_{36}Rh_6S_6$ |                              |
| Formula weight                                      | 3532.34                                   |                              |
| Temperature                                         | 173(2) K                                  |                              |
| Wavelength                                          | 1.54178 Å                                 |                              |
| Crystal system                                      | Monoclinic                                |                              |
| Space group                                         | C2/c                                      |                              |
| Unit cell dimensions                                | $a = 22.900(2)$ Å                         | $\alpha = 90^\circ$ .        |
|                                                     | $b = 25.994(2)$ Å                         | $\beta = 111.608(9)^\circ$ . |
|                                                     | $c = 29.597(3)$ Å                         | $\gamma = 90^\circ$ .        |
| Volume                                              | 16380(3) Å <sup>3</sup>                   |                              |
| Z                                                   | 4                                         |                              |
| Density (calculated)                                | 1.432 Mg/m <sup>3</sup>                   |                              |
| Absorption coefficient                              | 6.272 mm <sup>-1</sup>                    |                              |
| F(000)                                              | 7160                                      |                              |
| Crystal size                                        | 0.250 x 0.220 x 0.180 mm <sup>3</sup>     |                              |
| Theta range for data collection                     | 2.683 to 70.989°.                         |                              |
| Index ranges                                        | -27 ≤ h ≤ 24, -31 ≤ k ≤ 23, -36 ≤ l ≤ 35  |                              |
| Reflections collected                               | 30837                                     |                              |
| Independent reflections                             | 15177 [ $R(\text{int}) = 0.0652$ ]        |                              |
| Completeness to theta = 67.679°                     | 97.9 %                                    |                              |
| Absorption correction                               | Semi-empirical from equivalents           |                              |
| Max. and min. transmission                          | 0.754 and 0.556                           |                              |
| Refinement method                                   | Full-matrix least-squares on $F^2$        |                              |
| Data / restraints / parameters                      | 15177 / 511 / 869                         |                              |
| Goodness-of-fit on F2                               | 1.035                                     |                              |
| Final R indices [ $I > 2\sigma(I)$ ] <sup>[a]</sup> | $R_1 = 0.1018$ , $wR_2 = 0.2954$          |                              |
| R indices (all data)                                | $R_1 = 0.1422$ , $wR_2 = 0.3249$          |                              |
| Extinction coefficient                              | n/a                                       |                              |
| Largest diff. peak and hole                         | 2.352 and -0.731 e.Å <sup>-3</sup>        |                              |

[a]  $R_1 = \sum ||F_o| - |F_c||$  (based on reflections with  $F_o^2 > 2\sigma F^2$ ).  $wR_2 = [\sum [w(F_o^2 - F_c^2)^2] / \sum [w(F_o^2)^2]]^{1/2}$ ;  $w = 1 / [\sigma^2(F_o^2) + (0.095P)^2]$ ;  $P = [\max(F_o^2, 0) + 2F_c^2] / 3$  (also with  $F_o^2 > 2\sigma F^2$ )

**Reference:**

S1. T. Sun, J. -P. Ma, R. -Q. Huang and Y. -B. Dong, *Acta Cryst.*, E62, o2751-o2752.
